# Supplementary material for: Potential envenomation by the aglyphous pseudoxyrhophiine snake Leioheterodon madagascariensis and description of its dentition
Source: PubMed Central journal article supplement (PMC4654879; doi:10.1186/s40409-015-0047-2), 2015-11-20

**Supplementary Figure S1**

Interactive PDF 3D model of the skull of the CT scanned *Leioheterodon madagascariensis* (ZSM 806/2001). Click image in Adobe Acrobat or Reader (version IX or later) to enable the 3D contents.

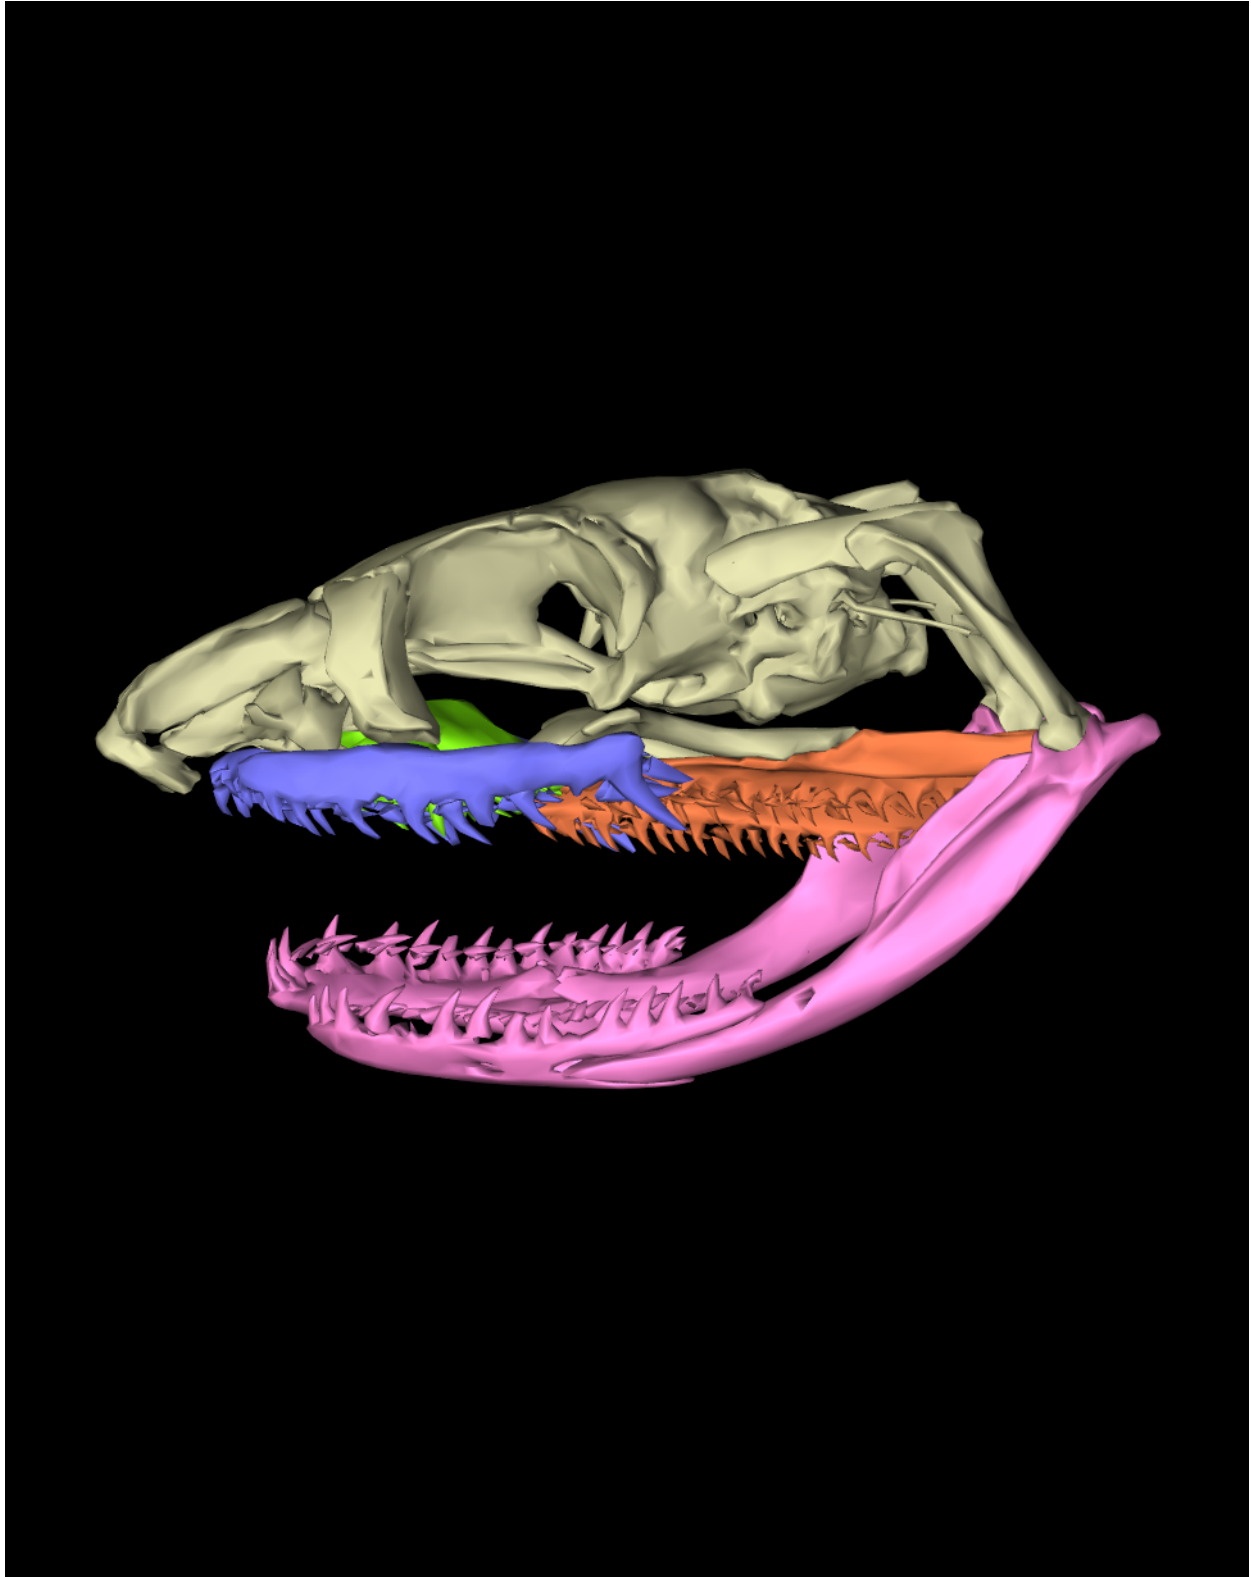

Supplement: 40409_2015_47_MOESM1_ESM.pdf [file 40409_2015_47_MOESM1_ESM.pdf]
